# Supplementary material for: How Attention Changes in Response to Carbohydrate Mouth Rinsing
Source: MDPI journal article supplement (doi:10.3390/nu15133053), 2023-07-06
Supplement: s1 [file s1]

## Experimental Conditions

**Table S1.** The sum of participants assigned to the experimental conditions.

| utility | solution_seq | task_seq      | n |
|---------|--------------|---------------|---|
| low     | nns_cho      | flanker_simon | 7 |
| low     | nns_cho      | simon_flanker | 5 |
| low     | cho_nns      | flanker_simon | 7 |
| low     | cho_nns      | simon_flanker | 7 |
| high    | nns_cho      | flanker_simon | 7 |
| high    | nns_cho      | simon_flanker | 7 |
| high    | cho_nns      | flanker_simon | 8 |
| high    | cho_nns      | simon_flanker | 5 |

### Simon Task

A modified Simon task was used that consisted of 600 trials per session. Each trial started with presenting a centrally located fixation stimulus (shape: circle, RGB color code: [.5, .5, .5], presentation duration: randomly varying between 50 to 80 frames, degrees of visual angle: .05°). Subsequently, the fixation was joined by a lateralized (left or right hemifield, relative to fixation) target stimulus (shape: rectangular [horizontal or vertical orientation], RGB color code: [.5, .5, .5], presentation duration: 10 frames, degrees of visual angle: 2°). The response had to be given before a deadline initially set at 450 ms. This deadline was constantly updated relative to the proportions of correct responses in the preceding ten trials. On the one hand, if the proportions of correct responses were < 80 %, the deadline was increased by 50 ms. On the other hand, if the proportions of correct responses were above 90 %, the deadline was decreased by 50 ms. If the deadline was violated, feedback was provided in the form of the red-colored word “SCHNELLER” (faster). All stimuli were presented on a black background. Participants were asked to respond as fast and accurately as possible with their right or left index finger to the orientation of the rectangular. Stimulus-response mapping was instructed before the start of the task. Target stimulus position and orientation could therefore be congruent or incongruent in terms of the spatial location of the target stimulus and the spatial location of the required button press. Proportions of congruency were either 75% congruent vs. 25 % incongruent or 25 % congruent vs. 75% incongruent. Participants were assigned to either one of the congruency proportion manipulations. The Simon task was interrupted after every 150 trials to allow for performing a brief mouth rinse.

## EEG Report

### EEG amplifier:

Type: actiCHamp

Manufacturer: Brain Products GmbH (Gilching, Germany)

### EEG recording software:

Type: BrainVision Recorder software

Version: v1.22.0001

Manufacturer: Brain Products GmbH (Gilching, Germany)

### EEG sensor cap:

Type: actiCAP

Manufacturer: Brain Products GmbH (Gilching, Germany)

**EEG sensor type:** Ag/AgCl active electrodes

**EEG sensor placement system:** international 10-10 system

**EEG sensor ids/locations:** AF3, AF4, AF7, AF8, AFz, C1, C2, C3, C4, C5, C6, CP1, CP2, CP3, CP4, CP5, CP6, CPz, F1, F2, F3, F4, F5, F6, F7, F8, FC1, FC2, FC3, FC4, FC5, FC6, FCz, FT7, FT8, Fp1, Fp2, Fz, O1, O2, Oz, P1, P2, P3, P4, P5, P6, P7, P8, PO3, PO4, PO7, PO8, POz, Pz, TP10, TP7, TP8, TP9.

**EOG sensors:** Horizontal and vertical electrooculograms were measured with four EEG electrodes positioned at the left (EEG sensor FT9 --> LO1) and right outer canthi (EEG sensor FT10 --> LO2) and above (EEG sensor T8 --> SO2) and below the right eye (EEG sensor T7 --> IO2).

**EEG recording sampling rate:** 1000 Hz

**EEG sensor impedances:** < 10 k $\Omega$

**EEG recording ground sensor:** Fpz

**EEG recording reference sensor:** Cz

### EEG online filtering:

Type: IIR Butterworth 2nd order causal lowpass

l\_freq: DC

h\_freq: 280 Hz (-3 dB)

**EEG offline processing sampling rate:** 1000 Hz

**Muscle artifacts:** Muscle artifacts were automatically detected and annotated within the continuous data using the `mne.preprocessing.annotate_muscle_zscore` function. The 'threshold' parameter was set at five z-scores and the 'min\_length\_good' parameter was set at 0.2 s. Time periods containing any muscle artifact annotation were rejected during epoching.

**Ocular artifacts:** Ocular artifact correction was performed using independent component analysis using MNE's implementation of the picard algorithm. Therefore, ICA decomposition was run on a filtered (type: IIR Butterworth 4th order zero-phase highpass; lower frequency cutoff: 1 Hz (-6 dB)) and evenly time-segmented (1-sec) copy of the raw EEG data. Segments with large voltage deviations

(peak-to-peak deviations  $> \{ \text{'eeg': 0.0005} \}$   $\mu\text{V}$  in any EEG channel), non-task periods (pre-/post task & rinsing), as well as bad channels, were ignored during decomposition. Subsequently, MNE's 'find\_bads\_eog' function automatically detected independent components reflecting vertical or horizontal eye movements. This selection was then visually cross-checked (independently) by two experienced EEG researchers. Visual inspection was performed by comparing the timing and shape of the ICA components with the EOG signals and examining the components' topographies. In the case of no consensus, a third experienced EEG researcher was brought in to contribute to a final decision concerning component selection. This last component selection was then zeroed out from a filtered copy of the raw data (see EEG offline filtering).

**EEG bad sensor detection:** Bad EEG sensors were automatically detected via MNE implementation of the PREP pipeline (functions: "bad\_by\_nan", "bad\_by\_flat", "bad\_by\_deviation", "bad\_by\_hf\_noise", "bad\_by\_correlation", "bad\_by\_SNR", "bad\_by\_dropout", "bad\_by\_ransac" (Bigdely-Shamlo et al., 2015 [40])).

**EEG bad sensor interpolation:** All bad EEG sensors were interpolated using spherical splines.

**EEG offline filtering:**

*Notch filter:*

Type: FIR one-pass, zero-phase, non-causal bandstop

Frequencies: 50, 100, 150, 200, 250

Filter length: 6601 samples

*Bandpass filter:*

Type: IIR Butterworth 4th order zero-phase bandpass

Lower frequency cutoff: 0.10 Hz (-6 dB)

Upper cutoff frequency: 30 Hz (-6 dB)

**EEG data re-referencing:** average reference

**EEG data segmentation/epoching:** The continuous data were segmented into target-locked epochs (correct trials) of 0.8 sec duration (0.2 sec pre-target interval; baseline correction interval: -0.2 : 0 sec).

**EEG sensors selected for statistical analysis:** All posterior and occipital electrodes (O1/2, P1/2, P3/4, P5/6, P7/8, PO3/4, PO7/8) were selected for the analysis of the N1pc and N2pc.

**ERP component scoring:**

The N1pc and N2pc were scored as mean amplitude. Component scoring ranges were identified unbiasedly using the "collapsed localizer technique" (Luck & Gaspelin 2017 [42]). Since the N2pc did not exhibit a clear peak, both components were scored as "peak-to-peak" to maintain scoring consistency between components. See Figure 1 for the collapsed localizer waveform used to identify the scoring time ranges.

N1pc scoring range = (0.89 s, 0.213 s)

N2pc scoring range = (0.213 s, 0.282 s)

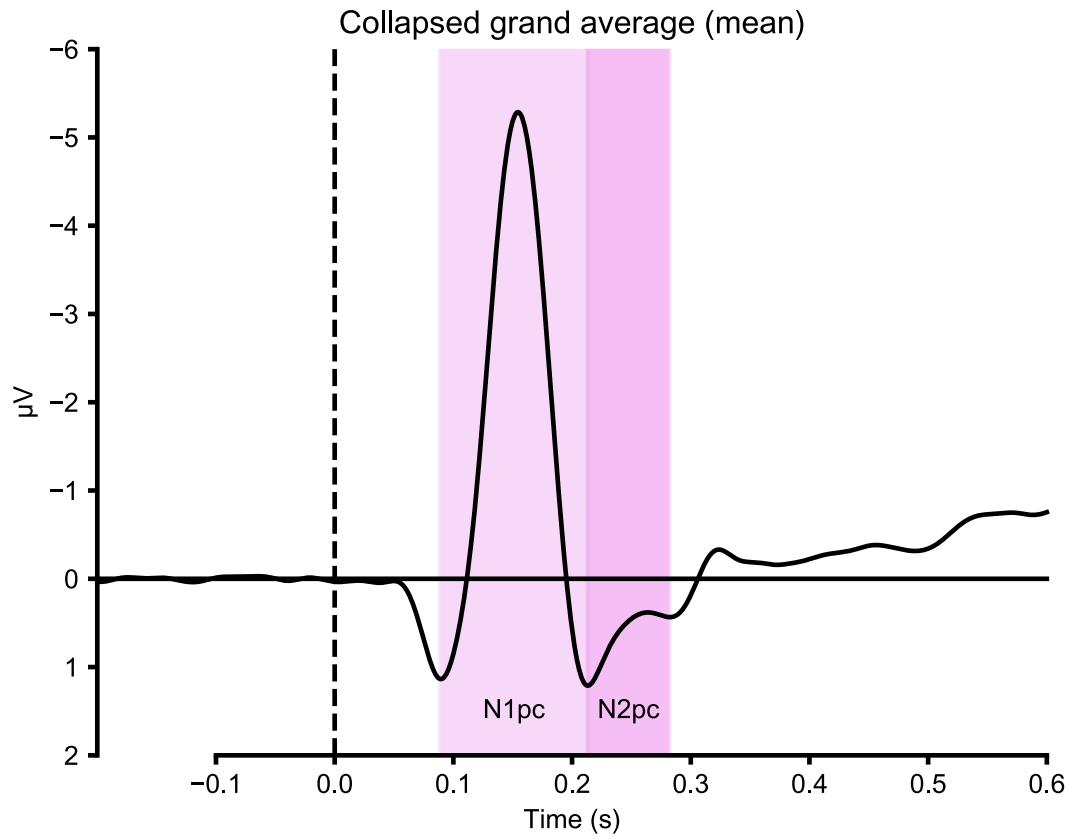

**Figure S1.** Grand average waveform for correct trials averaged across all conditions. The displayed data are re-referenced to the average reference and baseline corrected ( $-0.2 \text{ s} : 0 \text{ s}$ ). The sections highlighted in purple represent the time intervals identified for ERP component scoring. Abbreviations: N1 posterior contralateral (N1pc), N2 posterior contralateral (N2pc).

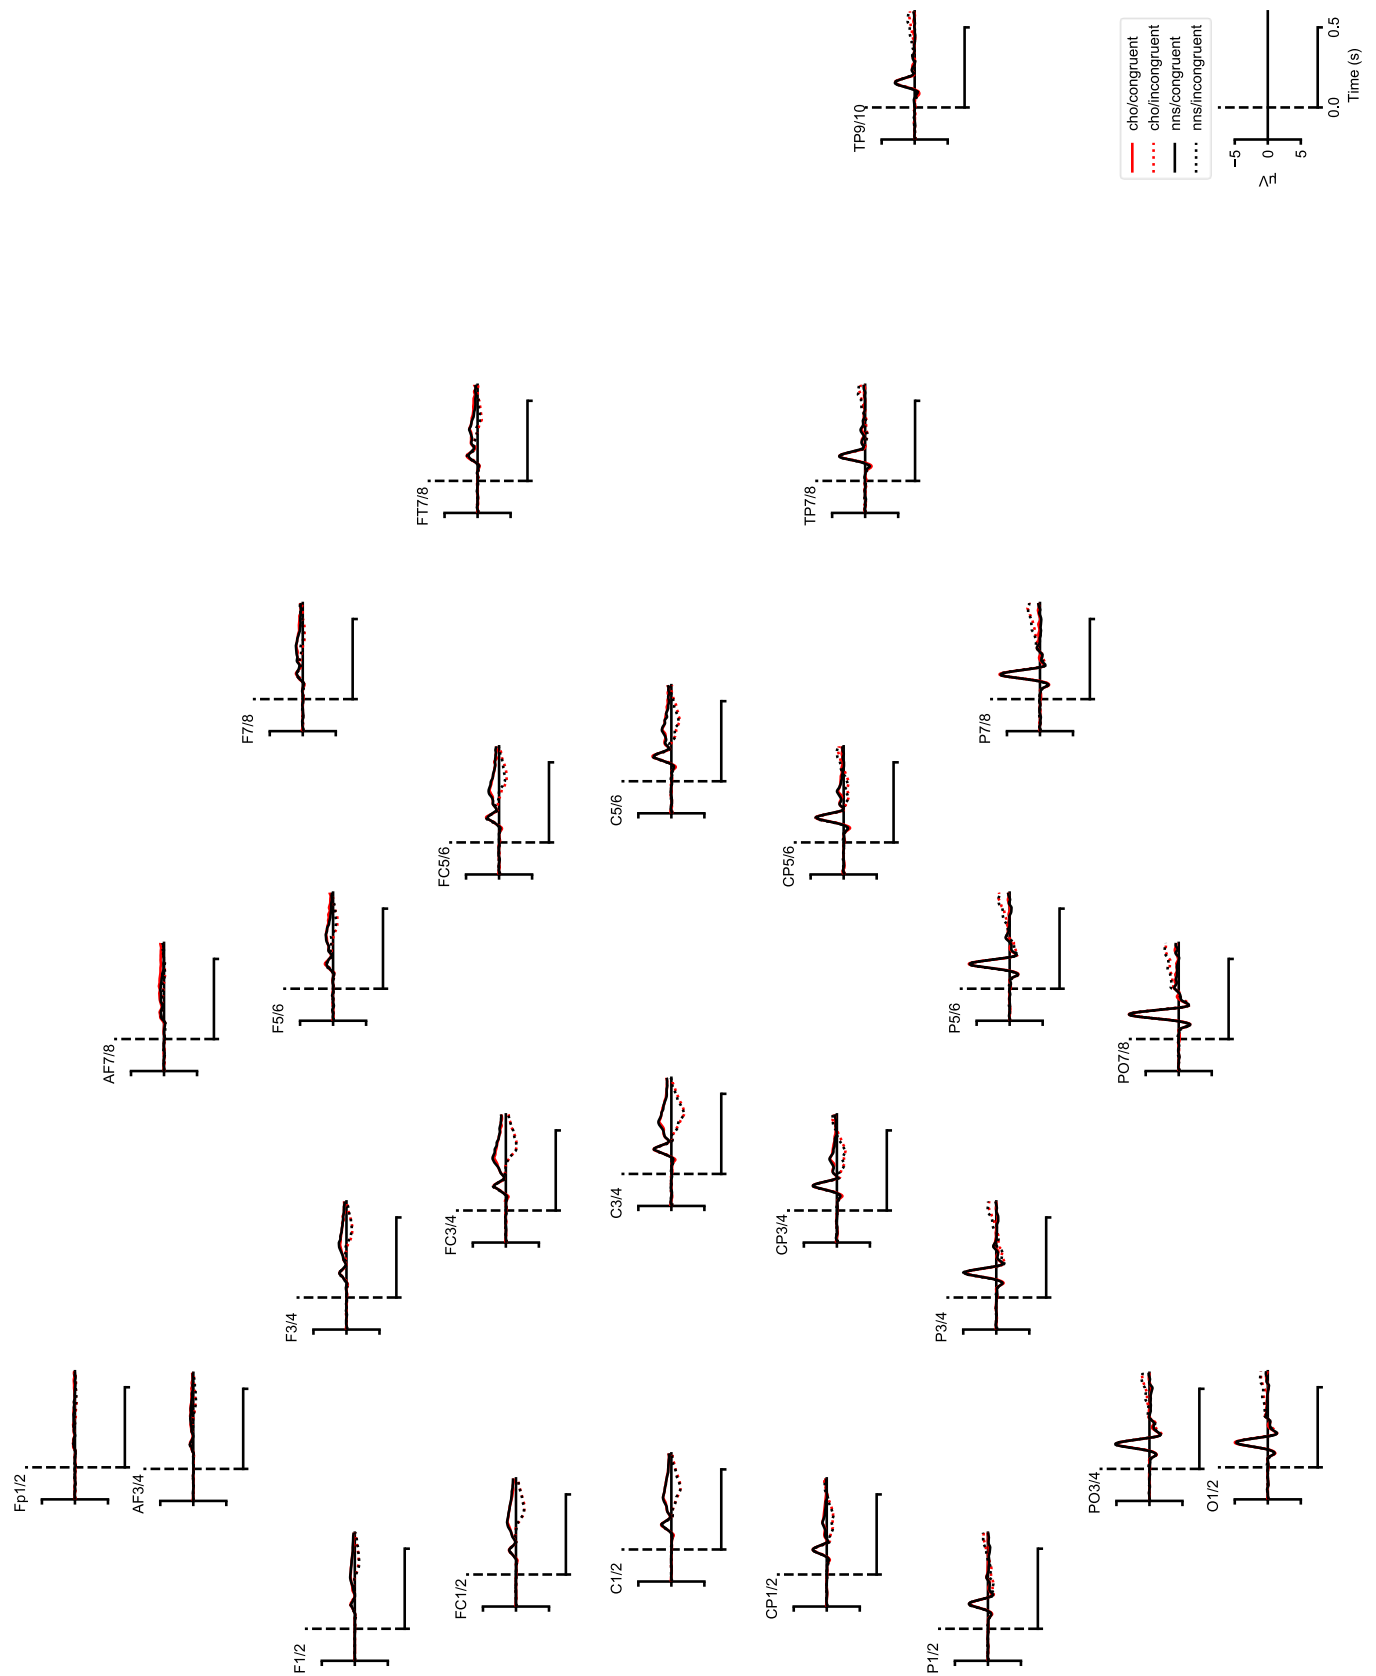

**Figure S2.** Grand average waveforms for the type of solution and congruency. Abbreviations: carbohydrate (cho), non-nutritive sweetener (nns).

## Results

### Preprocessing

#### *Interpolated channels*

**Table S2.** ANOVA Table for the number of interpolated channels.

| <b>dv_type</b>                   | <b>Cases</b>         | <b>Sphericity_Correction</b> | <b>Mean_Square_d_Error</b> | <b>df(nu<br/>m)</b> | <b>df(d<br/>en)</b> | <b>F</b> | <b>p</b> | <b>partial_eta_s<br/>quared</b> |
|----------------------------------|----------------------|------------------------------|----------------------------|---------------------|---------------------|----------|----------|---------------------------------|
| interpol<br>ated<br>channel<br>s | solution             | None                         | 5.06                       | 1                   | 51                  | 0.32     | 0.572    | 0.01                            |
| interpol<br>ated<br>channel<br>s | utility              | None                         | 9.06                       | 1                   | 51                  | 0.26     | 0.614    | 0.01                            |
| interpol<br>ated<br>channel<br>s | solution:<br>utility | None                         | 5.06                       | 1                   | 51                  | 0.16     | 0.691    | 0                               |

**Table S3.** Descriptive statistics for number of interpolated channels.

| <b>dv_type</b>           | <b>solution</b> | <b>utility</b> | <b>N</b> | <b>Mean</b> | <b>SD</b> | <b>SE</b> |
|--------------------------|-----------------|----------------|----------|-------------|-----------|-----------|
| interpolated<br>channels | cho             | high           | 26       | 4.731       | 3.584     | 0.703     |
| interpolated<br>channels | cho             | low            | 27       | 4.259       | 2.086     | 0.402     |
| interpolated<br>channels | nns             | high           | 26       | 4.308       | 2.71      | 0.531     |
| interpolated<br>channels | nns             | low            | 27       | 4.185       | 1.981     | 0.381     |

*Removed ocular ICA components*

**Table S4.** ANOVA Table for removed ocular components.

| <b>dv_type</b> | <b>Cases</b>      | <b>Sphericity_Correction</b> | <b>Mean_Square_d_Error</b> | <b>df(num)</b> | <b>df(den)</b> | <b>F</b> | <b>p</b> | <b>partial_eta_squared</b> |
|----------------|-------------------|------------------------------|----------------------------|----------------|----------------|----------|----------|----------------------------|
| icaComponent   | solution          | None                         | 0.13                       | 1              | 51             | 68       | 12       | 0.01                       |
| icaComponent   | utility           | None                         | 0.25                       | 1              | 51             | 88       | 04       | 0.02                       |
| icaComponent   | solution: utility | None                         | 0.13                       | 1              | 51             | 88       | 73       | 0                          |

**Table S5.** Descriptive statistics for removed ocular components.

| <b>dv_type</b> | <b>solution</b> | <b>utility</b> | <b>N</b> | <b>Mean</b> | <b>SD</b> | <b>SE</b> |
|----------------|-----------------|----------------|----------|-------------|-----------|-----------|
| icaComponent   | cho             | high           | 26       | 1.731       | 0.604     | 0.118     |
| icaComponent   | cho             | low            | 27       | 1.852       | 0.362     | 0.07      |
| icaComponent   | nns             | high           | 26       | 1.808       | 0.402     | 0.079     |
| icaComponent   | nns             | low            | 27       | 1.889       | 0.32      | 0.062     |

*Trials included into analysis*

**Table S6.** ANOVA Table for trials included into analysis.

| dv_type | Cases                       | Sphericity_Correction | Mean_Square_d_Error | df(num) | df(den) | F       | p  | partial_eta_squared |
|---------|-----------------------------|-----------------------|---------------------|---------|---------|---------|----|---------------------|
| trials  | congruency                  | None                  | 295.87              | 1       | 51      | 70.02   | 0  | 0.58                |
| trials  | solution                    | None                  | 434.73              | 1       | 51      | 0.39    | 36 | 0.01                |
| trials  | utility                     | None                  | 664.55              | 1       | 51      | 8.33    | 06 | 0.14                |
| trials  | congruency:utility          | None                  | 295.87              | 1       | 51      | 8751.46 | 0  | 0.99                |
| trials  | solution:utility            | None                  | 434.73              | 1       | 51      | 0.03    | 66 | 0                   |
| trials  | solution:congruency         | None                  | 102.96              | 1       | 51      | 0.8     | 75 | 0.02                |
| trials  | congruency:solution:utility | None                  | 102.96              | 1       | 51      | 0.58    | 5  | 0.01                |

**Table S7.** Descriptive statistics for the trials included into analysis.

| dv_type | solution | utility | congruency  | N  | Mean    | SD     | SE    |
|---------|----------|---------|-------------|----|---------|--------|-------|
| trials  | cho      | high    | congruent   | 26 | 326.615 | 19.079 | 3.742 |
| trials  | cho      | high    | incongruent | 26 | 83.462  | 13.846 | 2.715 |
| trials  | cho      | low     | congruent   | 27 | 93.778  | 9.399  | 1.809 |
| trials  | cho      | low     | incongruent | 27 | 294.889 | 25.906 | 4.986 |
| trials  | nns      | high    | congruent   | 26 | 322.038 | 22.238 | 4.361 |
| trials  | nns      | high    | incongruent | 26 | 83.5    | 11.158 | 2.188 |
| trials  | nns      | low     | congruent   | 27 | 92.296  | 12.316 | 2.37  |
| trials  | nns      | low     | incongruent | 27 | 293.778 | 29.966 | 5.767 |

**Table S8.** Post Hoc Comparisons—CONGRUENCY.

| dv_type | contrast              | estimate | SE   | df | t.ratio | p.value | cohens_d |
|---------|-----------------------|----------|------|----|---------|---------|----------|
| trials  | congruent-incongruent | 19.8     | 2.36 | 51 | 8.368   | 0       | 1.02     |

**Table S9.** Post Hoc Comparisons—UTILITY.

| dv_type | contrast | estimate | SE   | df | t.ratio | p.value | cohens_d |
|---------|----------|----------|------|----|---------|---------|----------|
| trials  | high-low | 10.2     | 3.54 | 51 | 2.885   | 0.0057  | 0.528    |



**Table S10.** Post Hoc Comparisons—CONGRUENCY x UTILITY.

| dv_type | contrast                             | estimate | SE   | df | t.ratio | p.value | cohens_d |
|---------|--------------------------------------|----------|------|----|---------|---------|----------|
| trials  | high_congruent-<br>low_congruent     | 231.29   | 3.51 | 51 | 65.825  | 0       | 11.951   |
| trials  | high_congruent-<br>high_incongruent  | 240.85   | 3.37 | 51 | 71.396  | 0       | 12.445   |
| trials  | high_congruent-<br>low_incongruent   | 29.99    | 4.24 | 51 | 7.066   | 0       | 1.55     |
| trials  | low_congruent-<br>high_incongruent   | 9.56     | 4.27 | 51 | 2.238   | 0.0296  | 0.494    |
| trials  | low_congruent-<br>low_incongruent    | -201.3   | 3.31 | 51 | 60.809  | 0       | -10.401  |
| trials  | high_incongruent-<br>low_incongruent | -210.85  | 4.89 | 51 | 43.122  | 0       | -10.895  |

**Table S11.** Trials included into analysis for each participant.

| dv_type | participant | utility | nns_congruent | nns_incongruent | cho_congruent | cho_incongruent |
|---------|-------------|---------|---------------|-----------------|---------------|-----------------|
| trials  | 1           | high    | 338           | 90              | 319           | 87              |
| trials  | 2           | high    | 322           | 83              | 296           | 62              |
| trials  | 3           | low     | 76            | 251             | 90            | 262             |
| trials  | 4           | low     | 87            | 275             | 101           | 330             |
| trials  | 5           | low     | 90            | 303             | 99            | 325             |
| trials  | 6           | high    | 301           | 74              | 314           | 90              |
| trials  | 7           | low     | 108           | 333             | 84            | 310             |
| trials  | 8           | low     | 62            | 242             | 91            | 300             |
| trials  | 9           | high    | 362           | 101             | 321           | 91              |
| trials  | 10          | low     | 104           | 318             | 95            | 296             |
| trials  | 11          | high    | 362           | 86              | 362           | 105             |
| trials  | 12          | high    | 344           | 100             | 318           | 87              |
| trials  | 13          | high    | 310           | 87              | 323           | 87              |
| trials  | 14          | low     | 87            | 274             | 88            | 289             |
| trials  | 15          | high    | 330           | 80              | 306           | 58              |
| trials  | 16          | high    | 333           | 95              | 321           | 94              |
| trials  | 17          | low     | 88            | 272             | 89            | 286             |
| trials  | 18          | high    | 298           | 66              | 313           | 67              |
| trials  | 20          | low     | 105           | 323             | 91            | 293             |
| trials  | 22          | high    | 291           | 75              | 317           | 69              |
| trials  | 25          | high    | 363           | 100             | 328           | 77              |
| trials  | 26          | low     | 80            | 233             | 92            | 243             |
| trials  | 27          | low     | 103           | 303             | 106           | 317             |
| trials  | 28          | high    | 290           | 89              | 330           | 94              |
| trials  | 29          | low     | 80            | 293             | 88            | 285             |
| trials  | 30          | low     | 91            | 310             | 77            | 240             |
| trials  | 31          | high    | 308           | 79              | 312           | 82              |
| trials  | 33          | high    | 315           | 83              | 329           | 93              |

|        |    |      |     |     |     |     |
|--------|----|------|-----|-----|-----|-----|
| trials | 34 | high | 317 | 81  | 350 | 93  |
| trials | 35 | low  | 110 | 316 | 105 | 310 |
| trials | 37 | low  | 74  | 225 | 111 | 282 |
| trials | 38 | high | 320 | 94  | 336 | 77  |
| trials | 39 | low  | 88  | 299 | 101 | 341 |
| trials | 40 | high | 308 | 91  | 330 | 104 |
| trials | 41 | high | 293 | 59  | 288 | 56  |
| trials | 42 | high | 347 | 91  | 329 | 83  |
| trials | 43 | low  | 104 | 277 | 100 | 288 |
| trials | 44 | low  | 104 | 332 | 98  | 280 |
| trials | 45 | high | 313 | 86  | 352 | 101 |
| trials | 47 | high | 297 | 79  | 348 | 89  |
| trials | 48 | low  | 81  | 309 | 82  | 303 |
| trials | 49 | high | 326 | 92  | 327 | 67  |
| trials | 51 | low  | 109 | 337 | 83  | 297 |
| trials | 52 | high | 332 | 64  | 370 | 98  |
| trials | 53 | low  | 109 | 296 | 83  | 283 |
| trials | 54 | low  | 96  | 292 | 100 | 286 |
| trials | 55 | low  | 91  | 291 | 103 | 297 |
| trials | 56 | low  | 90  | 297 | 80  | 283 |
| trials | 57 | high | 344 | 71  | 342 | 73  |
| trials | 58 | low  | 94  | 322 | 86  | 289 |
| trials | 59 | high | 309 | 75  | 311 | 86  |
| trials | 60 | low  | 85  | 318 | 110 | 360 |
| trials | 61 | low  | 96  | 291 | 99  | 287 |

---

EEG  
N1pc

**Table S12.** ANOVA Table for N1pc amplitude.

| dv_type | Cases               | Sphericity_Correction | Mean_Squared_Error | df(num) | df(den) | F    | p     | partial_eta_squared |
|---------|---------------------|-----------------------|--------------------|---------|---------|------|-------|---------------------|
| n1pc    | congruency          | None                  | 0.17               | 1       | 51      | 0.15 | 0.704 | 0                   |
| n1pc    | solution            | None                  | 0.15               | 1       | 51      | 0.03 | 0.867 | 0.06                |
| n1pc    | utility             | None                  | 5.21               | 1       | 51      | 0.15 | 0.703 | 0                   |
| n1pc    | congruency:utility  | None                  | 0.17               | 1       | 51      | 0.25 | 0.614 | 0.08                |
| n1pc    | solution:utility    | None                  | 0.15               | 1       | 51      | 0.01 | 0.913 | 0                   |
| n1pc    | solution:congruency | None                  | 0.04               | 1       | 51      | 0.09 | 0.764 | 0.15                |
| n1pc    | congruency:solution | None                  | 0.04               | 1       | 51      | 0.02 | 0.879 | 0                   |

**Table S13.** Descriptive statistics for N1pc amplitude.

| dv_type | solution | utility | congruency  | N  | Mean   | SD    | SE    |
|---------|----------|---------|-------------|----|--------|-------|-------|
| n1pc    | cho      | high    | congruent   | 26 | -1.69  | 1.1   | 0.216 |
| n1pc    | cho      | high    | incongruent | 26 | -1.701 | 1.012 | 0.198 |
| n1pc    | cho      | low     | congruent   | 27 | -1.918 | 1.237 | 0.238 |
| n1pc    | cho      | low     | incongruent | 27 | -1.701 | 1.068 | 0.206 |
| n1pc    | nns      | high    | congruent   | 26 | -1.693 | 1.181 | 0.232 |
| n1pc    | nns      | high    | incongruent | 26 | -1.874 | 1.235 | 0.242 |
| n1pc    | nns      | low     | congruent   | 27 | -1.941 | 1.295 | 0.249 |
| n1pc    | nns      | low     | incongruent | 27 | -1.878 | 1.275 | 0.245 |

**Table S14.** Post Hoc Comparisons—CONGRUENCY x UTILITY.

| dv_type | contrast                         | estimate | SE     | df | t.ratio | p.value | cohens_d |
|---------|----------------------------------|----------|--------|----|---------|---------|----------|
| n1pc    | low_congruent-low_incongruent    | -0.13993 | 0.0802 | 51 | -1.744  | 0.3486  | -0.1185  |
| n1pc    | high_congruent-high_incongruent  | 0.09624  | 0.0818 | 51 | 1.177   | 0.7338  | 0.0815   |
| n1pc    | low_congruent-high_congruent     | -0.23829 | 0.3262 | 51 | -0.730  | 0.9370  | -0.2019  |
| n1pc    | low_incongruent-high_incongruent | -0.00212 | 0.3111 | 51 | -0.007  | 0.9946  | -0.0018  |

**Table S15.** Post Hoc Comparisons—SOLUTION x CONGRUENCY.

| <b>dv_type</b> | <b>contrast</b>                     | <b>estimate</b> | <b>SE</b> | <b>df</b> | <b>t.ratio</b> | <b>p.value</b> | <b>cohens_d</b> |
|----------------|-------------------------------------|-----------------|-----------|-----------|----------------|----------------|-----------------|
| n1pc           | nns_congruent-<br>nns_incongruent   | 0.0591          | 0.0703    | 51        | 0.841          | 0.8090         | 0.0501          |
| n1pc           | cho_congruent-<br>cho_incongruent   | -0.1028         | 0.0554    | 51        | -1.856         | 0.2075         | -0.0871         |
| n1pc           | nns_congruent-<br>cho_congruent     | -0.0127         | 0.0594    | 51        | -0.214         | 0.8310         | -0.0108         |
| n1pc           | nns_incongruent-<br>cho_incongruent | -0.1747         | 0.0606    | 51        | -2.884         | 0.0230         | -0.1480         |

N2pc

**Table S16.** ANOVA Table for N2pc amplitude.

| dv_type | Cases                       | Sphericity_Correction | Mean_Squared_Error | df(numerator) | df(denominator) | F     | p     | partial_eta_squared |
|---------|-----------------------------|-----------------------|--------------------|---------------|-----------------|-------|-------|---------------------|
| n2pc    | congruency                  | None                  | 0.44               | 1             | 51              | 15.05 | 0     | 0.23                |
| n2pc    | solution                    | None                  | 0.22               | 1             | 51              | 0.34  | 0.56  | 0.01                |
| n2pc    | utility                     | None                  | 3.35               | 1             | 51              | 2.30  | 0.136 | 0.04                |
| n2pc    | congruency:utility          | None                  | 0.44               | 1             | 51              | 15.07 | 0     | 0.29                |
| n2pc    | solution:utility            | None                  | 0.22               | 1             | 51              | 0.38  | 0.2   | 0.02                |
| n2pc    | solution:congruency         | None                  | 0.16               | 1             | 51              | 5.88  | 0.019 | 0.1                 |
| n2pc    | congruency:solution:utility | None                  | 0.16               | 1             | 51              | 0.51  | 0.477 | 0.01                |

**Table S17.** Descriptive statistics for N2pc amplitude.

| dv_type | solution | utility | congruency  | N  | Mean   | SD    | SE    |
|---------|----------|---------|-------------|----|--------|-------|-------|
| n2pc    | cho      | high    | congruent   | 26 | 0.818  | 1.007 | 0.198 |
| n2pc    | cho      | high    | incongruent | 26 | 0.851  | 0.922 | 0.181 |
| n2pc    | cho      | low     | congruent   | 27 | -0.089 | 1.059 | 0.204 |
| n2pc    | cho      | low     | incongruent | 27 | 0.855  | 1.023 | 0.197 |
| n2pc    | nns      | high    | congruent   | 26 | 0.88   | 0.977 | 0.192 |
| n2pc    | nns      | high    | incongruent | 26 | 0.724  | 0.909 | 0.178 |
| n2pc    | nns      | low     | congruent   | 27 | 0.192  | 1.004 | 0.193 |
| n2pc    | nns      | low     | incongruent | 27 | 0.789  | 1.229 | 0.237 |

**Table S18.** Post Hoc Comparisons—CONGRUENCY.

| dv_type | contrast              | estimate | SE     | df | t.ratio | p.value | cohens_d |
|---------|-----------------------|----------|--------|----|---------|---------|----------|
| n2pc    | congruent-incongruent | -0.354   | 0.0913 | 51 | -3.879  | 0.0003  | -0.347   |

**Table S19.** Post Hoc Comparisons—CONGRUENCY x UTILITY.

| dv_type | contrast                         | estimate | SE    | df | t.ratio | p.value | cohens_d |
|---------|----------------------------------|----------|-------|----|---------|---------|----------|
| n2pc    | low_congruent-low_incongruent    | -0.7700  | 0.128 | 51 | -6.018  | <.0001  | -0.7537  |
| n2pc    | high_congruent-high_incongruent  | 0.0614   | 0.130 | 51 | 0.471   | 1.0000  | 0.0601   |
| n2pc    | low_congruent-high_congruent     | -0.7971  | 0.267 | 51 | -2.984  | 0.0131  | -0.7802  |
| n2pc    | low_incongruent-high_incongruent | 0.0343   | 0.268 | 51 | 0.128   | 1.0000  | 0.0336   |

**Table S20.** Post Hoc Comparisons—SOLUTION x CONGRUENCY.

| <b>dv_type</b> | <b>contrast</b>                     | <b>estimate</b> | <b>SE</b> | <b>df</b> | <b>t.ratio</b> | <b>p.value</b> | <b>cohens_d</b> |
|----------------|-------------------------------------|-----------------|-----------|-----------|----------------|----------------|-----------------|
| n2pc           | nns_congruent-<br>nns_incongruent   | -0.221          | 0.1113    | 51        | -1.983         | 0.1055         | -0.2159         |
| n2pc           | cho_congruent-<br>cho_incongruent   | -0.488          | 0.1019    | 51        | -4.789         | 0.0001         | -0.4776         |
| n2pc           | nns_congruent-<br>cho_congruent     | 0.171           | 0.0778    | 51        | 2.204          | 0.0962         | 0.1677          |
| n2pc           | nns_incongruent-<br>cho_incongruent | -0.096          | 0.0910    | 51        | -1.054         | 0.2968         | -0.0939         |

## Behavior

Response times (rt)

**Table S21.** ANOVA Table for response times.

| dv_t<br>type | Cases                           | Sphericity_C<br>orrection | Mean_Squar<br>ed_Error | df(n<br>um) | df(d<br>en) | F      | p    | partial_eta_<br>squared |
|--------------|---------------------------------|---------------------------|------------------------|-------------|-------------|--------|------|-------------------------|
| rt           | congruency                      | None                      | 312.28                 | 1           | 51          | 193.43 | 0.00 | 0.79                    |
| rt           | solution                        | None                      | 1578.4                 | 1           | 51          | 7.01   | 0.82 | 0.00                    |
| rt           | utility                         | None                      | 9528.45                | 1           | 51          | 9.48   | 0.31 | 0.09                    |
| rt           | congruency:utili<br>ty          | None                      | 312.28                 | 1           | 51          | 232.35 | 0.00 | 0.82                    |
| rt           | solution:utility                | None                      | 1578.4                 | 1           | 51          | 1.50   | 0.26 | 0.03                    |
| rt           | solution:congrue<br>ncy         | None                      | 110.41                 | 1           | 51          | 1.50   | 0.26 | 0.03                    |
| rt           | congruency:solu<br>tion:utility | None                      | 110.41                 | 1           | 51          | 9.02   | 0.14 | 0.03                    |
| rt           |                                 | None                      | 110.41                 | 1           | 51          | 1.30   | 0.26 | 0.02                    |

**Table S22.** Descriptive statistics for response times.

| dv_type | solution | utility | congruency  | N  | Mean    | SD     | SE     |
|---------|----------|---------|-------------|----|---------|--------|--------|
| rt      | cho      | high    | congruent   | 26 | 374.805 | 37.825 | 7.418  |
| rt      | cho      | high    | incongruent | 26 | 445.75  | 49.357 | 9.68   |
| rt      | cho      | low     | congruent   | 27 | 387.185 | 61.506 | 11.837 |
| rt      | cho      | low     | incongruent | 27 | 387.407 | 60.563 | 11.655 |
| rt      | nns      | high    | congruent   | 26 | 379.41  | 46.198 | 9.06   |
| rt      | nns      | high    | incongruent | 26 | 450.01  | 58.514 | 11.476 |
| rt      | nns      | low     | congruent   | 27 | 381.713 | 59.318 | 11.416 |
| rt      | nns      | low     | incongruent | 27 | 375.007 | 50.829 | 9.782  |

**Table S23.** Post Hoc Comparisons—CONGREUNCY.

| dv_type | contrast                  | estimate | SE   | df | t.ratio | p.value | cohens_d |
|---------|---------------------------|----------|------|----|---------|---------|----------|
| rt      | congruent-<br>incongruent | -33.8    | 2.43 | 51 | -13.908 | <.0001  | -0.629   |

**Table S24.** Post Hoc Comparisons—UTILITY.

| dv_type | contrast     | estimate | SE   | df | t.ratio | p.value | cohens_d |
|---------|--------------|----------|------|----|---------|---------|----------|
| rt      | high-<br>low | 29.7     | 13.4 | 51 | 2.212   | 0.0315  | 0.553    |

**Table S25.** Post Hoc Comparisons—CONGRUENCY x UTILITY.

| dv_type | contrast                             | estimate | SE    | df | t.ratio | p.value | cohens_d |
|---------|--------------------------------------|----------|-------|----|---------|---------|----------|
| rt      | low_congruent-<br>low_incongruent    | 3.24     | 3.40  | 51 | 0.953   | 0.6898  | 0.0604   |
|         | high_congruent-                      |          |       |    | -       |         |          |
| rt      | high_incongruent                     | -70.77   | 3.47  | 51 | 20.421  | <.0001  | -1.3182  |
| rt      | low_congruent-<br>high_congruent     | 7.34     | 13.38 | 51 | 0.549   | 0.6898  | 0.1367   |
| rt      | low_incongruent-<br>high_incongruent | -66.67   | 13.87 | 51 | -4.807  | <.0001  | -1.2419  |



Proportions of correct responses (%correct)

**Table S26.** ANOVA Table for proportions of correct responses.

| <b>dv_type</b> | <b>Cases</b>                | <b>Sphericity_Correction</b> | <b>Mean_Squared_Error</b> | <b>df(nu)</b> | <b>df(den)</b> | <b>F</b> | <b>p</b> | <b>partial_eta_squared</b> |
|----------------|-----------------------------|------------------------------|---------------------------|---------------|----------------|----------|----------|----------------------------|
| %correct       |                             |                              |                           |               |                | 79.      |          |                            |
| rect           | congruency                  | None                         | 58.48                     | 1             | 51             | 32       | 0        | 0.61                       |
| %correct       |                             |                              |                           |               |                | 0.5      | 0.4      |                            |
| rect           | solution                    | None                         | 24.73                     | 1             | 51             | 4        | 67       | 0.01                       |
| %correct       |                             |                              |                           |               |                | 3.4      | 0.0      |                            |
| rect           | utility                     | None                         | 49.35                     | 1             | 51             | 3        | 7        | 0.06                       |
| %correct       |                             |                              |                           |               |                | 21       |          |                            |
| rect           | congruency:utility          | None                         | 58.48                     | 1             | 51             | 5.3      | 0        | 0.81                       |
| %correct       |                             |                              |                           |               |                | 3.2      | 0.0      |                            |
| rect           | solution:utility            | None                         | 24.73                     | 1             | 51             | 9        | 76       | 0.06                       |
| %correct       |                             |                              |                           |               |                | 1.1      | 0.2      |                            |
| rect           | solution:congruency         | None                         | 18.71                     | 1             | 51             | 1        | 96       | 0.02                       |
| %correct       |                             |                              |                           |               |                | 0.0      | 0.8      |                            |
| rect           | congruency:solution:utility | None                         | 18.71                     | 1             | 51             | 3        | 55       | 0                          |

**Table S27.** Descriptive statistics for proportions of correct responses.

| <b>dv_type</b> | <b>solution</b> | <b>utility</b> | <b>congruency</b> | <b>N</b> | <b>Mean</b> | <b>SD</b> | <b>SE</b> |
|----------------|-----------------|----------------|-------------------|----------|-------------|-----------|-----------|
| %correct       | cho             | high           | congruent         | 26       | 96.576      | 1.888     | 0.37      |
| %correct       | cho             | high           | incongruent       | 26       | 71.285      | 10.31     | 2.022     |
| %correct       | cho             | low            | congruent         | 27       | 84.295      | 6.599     | 1.27      |
| %correct       | cho             | low            | incongruent       | 27       | 89.618      | 3.64      | 0.7       |
| %correct       | nns             | high           | congruent         | 26       | 96.797      | 1.859     | 0.365     |
| %correct       | nns             | high           | incongruent       | 26       | 72.543      | 8.341     | 1.636     |
| %correct       | nns             | low            | congruent         | 27       | 81.819      | 6.693     | 1.288     |
| %correct       | nns             | low            | incongruent       | 27       | 88.614      | 4.392     | 0.845     |

**Table S28.** Post Hoc Comparisons—CONGRUENCY.

| <b>dv_type</b> | <b>contrast</b> | <b>estimate</b> | <b>SE</b> | <b>df</b> | <b>t.ratio</b> | <b>p.value</b> | <b>cohens_d</b> |
|----------------|-----------------|-----------------|-----------|-----------|----------------|----------------|-----------------|
|                | congruent-      |                 |           |           |                |                |                 |
| %correct       | incongruent     | 9.36            | 1.05      | 51        | 8.906          | <.0001         | 1.52            |

**Table S29.** Post Hoc Comparisons—CONGRUENCY x UTILITY.

| <b>dv_type</b> | <b>contrast</b>  | <b>estimate</b> | <b>SE</b> | <b>df</b> | <b>t.ratio</b> | <b>p.value</b> | <b>cohens_d</b> |
|----------------|------------------|-----------------|-----------|-----------|----------------|----------------|-----------------|
|                | low_congruent-   |                 |           |           |                |                |                 |
| %correct       | low_incongruent  | -6.06           | 1.47      | 51        | -4.117         | 0.0001         | -0.985          |
|                | high_congruent-  |                 |           |           |                |                |                 |
| %correct       | high_incongruent | 24.77           | 1.50      | 51        | 16.518         | <.0001         | 4.028           |
|                | low_congruent-   |                 |           |           | -              |                |                 |
| %correct       | high_congruent   | -13.63          | 1.04      | 51        | 13.134         | <.0001         | -2.216          |
|                | low_incongruent- |                 |           |           |                |                |                 |
| %correct       | high_incongruent | 17.20           | 1.73      | 51        | 9.942          | <.0001         | 2.797           |

## Questionnaires

### Hunger

**Table S30.** ANOVA Table for hunger ratings.

| dv_t<br>type | Cases                   | Sphericity_Cor<br>rection | Mean_Square<br>d_Error | df(nu<br>m) | df(d<br>en) | F    | p     | partial_eta_s<br>quared |
|--------------|-------------------------|---------------------------|------------------------|-------------|-------------|------|-------|-------------------------|
| hung<br>er   | solution                | None                      | 5.7                    | 1           | 51          | 0.2  | 0.655 | 0                       |
| hung<br>er   | tp                      | None                      | 2.92                   | 2           | 102         | 77.9 | 0     | 0.16                    |
| hung<br>er   | utility                 | None                      | 36.73                  | 1           | 51          | 0.04 | 0.849 | 0                       |
| hung<br>er   | solution:uti<br>lity    | None                      | 5.7                    | 1           | 51          | 1.2  | 0.279 | 0.02                    |
| hung<br>er   | solution:tp             | Greenhouse-<br>Geisser    | 3.03                   | 1.59        | 80.95       | 4.6  | 0.019 | 0.08                    |
| hung<br>er   | tp:utility              | None                      | 2.92                   | 2           | 102         | 1.84 | 0.165 | 0.03                    |
| hung<br>er   | solution:tp:<br>utility | Greenhouse-<br>Geisser    | 3.03                   | 1.59        | 80.95       | 0.38 | 0.634 | 0.01                    |

**Table S31.** Descriptive statistics for hunger ratings.

| dv_type | solution | utility | tp  | N  | Mean  | SD    | SE    |
|---------|----------|---------|-----|----|-------|-------|-------|
| hunger  | cho      | high    | tp1 | 27 | 5.56  | 2.684 | 0.517 |
| hunger  | cho      | high    | tp2 | 27 | 5.411 | 3.302 | 0.636 |
| hunger  | cho      | high    | tp3 | 27 | 6.056 | 3.406 | 0.655 |
| hunger  | cho      | low     | tp1 | 26 | 5.95  | 2.744 | 0.538 |
| hunger  | cho      | low     | tp2 | 26 | 5.083 | 2.818 | 0.553 |
| hunger  | cho      | low     | tp3 | 26 | 5.505 | 3.159 | 0.619 |
| hunger  | nns      | high    | tp1 | 27 | 4.796 | 3.122 | 0.601 |
| hunger  | nns      | high    | tp2 | 27 | 4.529 | 3.181 | 0.612 |
| hunger  | nns      | high    | tp3 | 27 | 6.461 | 3.135 | 0.603 |
| hunger  | nns      | low     | tp1 | 26 | 5.512 | 2.696 | 0.529 |
| hunger  | nns      | low     | tp2 | 26 | 5.215 | 2.508 | 0.492 |
| hunger  | nns      | low     | tp3 | 26 | 6.328 | 2.736 | 0.537 |

**Table S32.** Post Hoc Comparisons—SOLUTION x TP.

| dv_type | contrast            | estimate | SE    | df | t.ratio | p.value | cohens_d |
|---------|---------------------|----------|-------|----|---------|---------|----------|
| hunger  | nns_tp1-<br>nns_tp2 | 0.2814   | 0.246 | 51 | 1.146   | 0.7548  | 0.09462  |
| hunger  | nns_tp1-<br>nns_tp3 | -1.2409  | 0.289 | 51 | -4.299  | 0.0006  | -0.41722 |
| hunger  | nns_tp2-<br>nns_tp3 | -1.5223  | 0.330 | 51 | -4.615  | 0.0002  | -0.51183 |
| hunger  | cho_tp1-<br>cho_tp2 | 0.5081   | 0.282 | 51 | 1.799   | 0.4679  | 0.17083  |

|        |                     |         |       |    |        |        |          |
|--------|---------------------|---------|-------|----|--------|--------|----------|
| hunger | cho_tp1-<br>cho_tp3 | -0.0256 | 0.406 | 51 | -0.063 | 0.9498 | -0.00862 |
| hunger | cho_tp2-<br>cho_tp3 | -0.5337 | 0.326 | 51 | -1.640 | 0.5361 | -0.17946 |
| hunger | nns_tp1-<br>cho_tp1 | -0.6011 | 0.306 | 51 | -1.964 | 0.3848 | -0.20209 |
| hunger | nns_tp2-<br>cho_tp2 | -0.3744 | 0.301 | 51 | -1.243 | 0.7548 | -0.12588 |
| hunger | nns_tp3-<br>cho_tp3 | 0.6142  | 0.461 | 51 | 1.332  | 0.7548 | 0.20650  |

**Table S33.** Post Hoc Comparisons—TP.

| <b>dv_type</b> | <b>contrast</b> | <b>estimate</b> | <b>SE</b> | <b>df</b> | <b>t.ratio</b> | <b>p.value</b> | <b>cohens_d</b> |
|----------------|-----------------|-----------------|-----------|-----------|----------------|----------------|-----------------|
| hunger         | tp1-tp2         | 0.395           | 0.218     | 51        | 1.808          | 0.0766         | 0.133           |
| hunger         | tp1-tp3         | -0.633          | 0.262     | 51        | -2.414         | 0.0389         | -0.213          |
| hunger         | tp2-tp3         | -1.028          | 0.220     | 51        | -4.664         | 0.0001         | -0.346          |

# Stress

**Table S34.** ANOVA Table for stress ratings.

| dv_t<br>ype | Cases                   | Sphericity_Co<br>rrection | Mean_Square<br>d_Error | df(nu<br>m) | df(d<br>en) | F   | p   | partial_eta_s<br>quared |
|-------------|-------------------------|---------------------------|------------------------|-------------|-------------|-----|-----|-------------------------|
| stress      | solution                | None                      | 2.06                   | 1           | 51          | 0.1 | 5   | 0.7                     |
| stress      | tp                      | Greenhouse-<br>Geisser    | 3.74                   | 1.51        | 76.86       | 14. | 17  | 0                       |
| stress      | utility                 | None                      | 11.25                  | 1           | 51          | 4.9 | 0.0 | 0.09                    |
| stress      | solution:uti<br>lity    | None                      | 2.06                   | 1           | 51          | 0.2 | 1   | 31                      |
| stress      | solution:tp             | Greenhouse-<br>Geisser    | 1.81                   | 1.64        | 83.58       | 0.6 | 0.4 | 0.02                    |
| stress      | tp:utility              | Greenhouse-<br>Geisser    | 3.74                   | 1.51        | 76.86       | 4.5 | 0.0 | 0.01                    |
| stress      | solution:tp:<br>utility | Greenhouse-<br>Geisser    | 1.81                   | 1.64        | 83.58       | 0.6 | 0.4 | 0.08                    |
| stress      | utility                 | Geisser                   | 1.81                   | 1.64        | 83.58       | 6   | 92  | 0.01                    |

**Table S35.** Descriptive statistics for stress ratings.

| dv_type | solution | utility | tp  | N  | Mean  | SD    | SE    |
|---------|----------|---------|-----|----|-------|-------|-------|
| stress  | cho      | high    | tp1 | 27 | 1.708 | 1.724 | 0.332 |
| stress  | cho      | high    | tp2 | 27 | 1.601 | 1.531 | 0.295 |
| stress  | cho      | high    | tp3 | 27 | 2.251 | 2.441 | 0.47  |
| stress  | cho      | low     | tp1 | 26 | 2.25  | 1.775 | 0.348 |
| stress  | cho      | low     | tp2 | 26 | 1.767 | 1.944 | 0.381 |
| stress  | cho      | low     | tp3 | 26 | 3.493 | 2.453 | 0.481 |
| stress  | nns      | high    | tp1 | 27 | 1.433 | 1.414 | 0.272 |
| stress  | nns      | high    | tp2 | 27 | 1.561 | 1.422 | 0.274 |
| stress  | nns      | high    | tp3 | 27 | 1.828 | 1.781 | 0.343 |
| stress  | nns      | low     | tp1 | 26 | 1.984 | 1.552 | 0.304 |
| stress  | nns      | low     | tp2 | 26 | 2.048 | 1.453 | 0.285 |
| stress  | nns      | low     | tp3 | 26 | 3.842 | 2.831 | 0.555 |

**Table S36.** Post Hoc Comparisons—UTILITY.

| dv_type | contrast     | estimate | SE    | df | t.ratio | p.value | cohens_d |
|---------|--------------|----------|-------|----|---------|---------|----------|
| stress  | high-<br>low | -0.834   | 0.376 | 51 | -2.216  | 0.0312  | -0.436   |

**Table S37.** Post Hoc Comparisons—UTILITY x TP.

| dv_type | contrast            | estimate | SE    | df | t.ratio | p.value | cohens_d |
|---------|---------------------|----------|-------|----|---------|---------|----------|
| stress  | low_tp1-<br>low_tp2 | 0.2098   | 0.217 | 51 | 0.969   | 1.0000  | 0.10980  |
| stress  | low_tp1-<br>low_tp3 | -1.5504  | 0.382 | 51 | -4.055  | 0.0014  | -0.81134 |

|        |                       |         |       |    |        |        |          |
|--------|-----------------------|---------|-------|----|--------|--------|----------|
| stress | low_tp2-<br>low_tp3   | -1.7602 | 0.363 | 51 | -4.848 | 0.0001 | -0.92114 |
| stress | high_tp1-<br>high_tp2 | -0.0109 | 0.213 | 51 | -0.051 | 1.0000 | -0.00572 |
| stress | high_tp1-<br>high_tp3 | -0.4692 | 0.375 | 51 | -1.250 | 1.0000 | -0.24553 |
| stress | high_tp2-<br>high_tp3 | -0.4582 | 0.356 | 51 | -1.286 | 1.0000 | -0.23981 |
| stress | low_tp1-<br>high_tp1  | 0.5467  | 0.396 | 51 | 1.380  | 1.0000 | 0.28612  |
| stress | low_tp2-<br>high_tp2  | 0.3260  | 0.387 | 51 | 0.842  | 1.0000 | 0.17060  |
| stress | low_tp3-<br>high_tp3  | 1.6279  | 0.575 | 51 | 2.832  | 0.0462 | 0.85193  |

**Table S38.** Post Hoc Comparisons—TP.

| <b>dv_type</b> | <b>contrast</b> | <b>estimate</b> | <b>SE</b> | <b>df</b> | <b>t.ratio</b> | <b>p.value</b> | <b>cohens_d</b> |
|----------------|-----------------|-----------------|-----------|-----------|----------------|----------------|-----------------|
| stress         | tp1-tp2         | 0.0994          | 0.152     | 51        | 0.655          | 0.5153         | 0.052           |
| stress         | tp1-tp3         | -1.0098         | 0.268     | 51        | -3.770         | 0.0009         | -0.528          |
| stress         | tp2-tp3         | -1.1092         | 0.254     | 51        | -4.361         | 0.0002         | -0.580          |

## Arousal

**Table S39.** ANOVA Table for arousal ratings.

| dv_t<br>type | Cases                   | Sphericity_Cor<br>rection | Mean_Square<br>d_Error | df(nu<br>m) | df(d<br>en) | F    | p     | partial_eta_s<br>quared |
|--------------|-------------------------|---------------------------|------------------------|-------------|-------------|------|-------|-------------------------|
| arous<br>al  | solution                | None                      | 2.32                   | 1           | 51          | 2.4  | 0.127 | 0.04                    |
| arous<br>al  | tp                      | Greenhouse-<br>Geisser    | 2.43                   | 1.52        | 77.4        | 0.35 | 0.644 | 0.01                    |
| arous<br>al  | utility                 | None                      | 7.11                   | 1           | 51          | 6.08 | 0.017 | 0.11                    |
| arous<br>al  | solution:uti<br>lity    | None                      | 2.32                   | 1           | 51          | 0.13 | 0.716 | 0                       |
| arous<br>al  | solution:tp             | Greenhouse-<br>Geisser    | 1.09                   | 1.51        | 76.97       | 2.25 | 0.125 | 0.04                    |
| arous<br>al  | tp:utility              | Greenhouse-<br>Geisser    | 2.43                   | 1.52        | 77.4        | 0.68 | 0.407 | 0.01                    |
| arous<br>al  | solution:tp:<br>utility | Greenhouse-<br>Geisser    | 1.09                   | 1.51        | 76.97       | 0.44 | 0.587 | 0.01                    |

**Table S40.** Descriptive statistics for arousal ratings.

| dv_type | solution | utility | tp  | N  | Mean  | SD    | SE    |
|---------|----------|---------|-----|----|-------|-------|-------|
| arousal | cho      | high    | tp1 | 27 | 2.685 | 1.449 | 0.279 |
| arousal | cho      | high    | tp2 | 27 | 2.655 | 1.374 | 0.264 |
| arousal | cho      | high    | tp3 | 27 | 2.519 | 1.221 | 0.235 |
| arousal | cho      | low     | tp1 | 26 | 3.308 | 1.379 | 0.27  |
| arousal | cho      | low     | tp2 | 26 | 3.038 | 1.399 | 0.274 |
| arousal | cho      | low     | tp3 | 26 | 3.538 | 2.005 | 0.393 |
| arousal | nns      | high    | tp1 | 27 | 2.667 | 1.359 | 0.261 |
| arousal | nns      | high    | tp2 | 27 | 3     | 1.414 | 0.272 |
| arousal | nns      | high    | tp3 | 27 | 2.799 | 1.469 | 0.283 |
| arousal | nns      | low     | tp1 | 26 | 3.346 | 1.548 | 0.304 |
| arousal | nns      | low     | tp2 | 26 | 3.769 | 1.986 | 0.39  |
| arousal | nns      | low     | tp3 | 26 | 3.75  | 1.986 | 0.39  |

**Table S41.** Post Hoc Comparisons—UTILITY.

| dv_type | contrast     | estimate | SE    | df | t.ratio | p.value | cohens_d |
|---------|--------------|----------|-------|----|---------|---------|----------|
| arousal | high-<br>low | -0.738   | 0.299 | 51 | -2.466  | 0.0170  | -0.47    |

# Affective valence

**Table S42.** ANOVA Table for affective valence ratings.

| dv_type           | Cases               | Sphericity_Correction | Mean_Square_d_Error | df(num) | df(den) | F    | p     | partial_eta_squared |
|-------------------|---------------------|-----------------------|---------------------|---------|---------|------|-------|---------------------|
| affective valence | solution            | None                  | 2.56                | 1       | 51      | 0.2  | 0.6   | 0                   |
| affective valence | tp                  | Greenhouse-Geisser    | 1.38                | 1.77    | 3       | 90.1 | 13.02 | 0.2                 |
| affective valence | utility             | None                  | 9.83                | 1       | 51      | 1.4  | 0.2   | 0.03                |
| affective valence | solution:utility    | None                  | 2.56                | 1       | 51      | 0.0  | 0.8   | 0                   |
| affective valence | solution:tp         | Greenhouse-Geisser    | 0.99                | 1.76    | 6       | 89.8 | 1.5   | 0.03                |
| affective valence | tp:utility          | Greenhouse-Geisser    | 1.38                | 1.77    | 3       | 90.1 | 4.3   | 0.08                |
| affective valence | solution:tp:utility | Greenhouse-Geisser    | 0.99                | 1.76    | 6       | 89.8 | 0.2   | 0.7                 |
| affective valence | utility             | Geisser               | 0.99                | 1.76    | 6       | 3    | 65    | 0                   |

**Table S43.** Descriptive statistics for affective valence.

| dv_type           | solution | utility | tp  | N  | Mean  | SD    | SE    |
|-------------------|----------|---------|-----|----|-------|-------|-------|
| affective valence | cho      | high    | tp1 | 27 | 6.63  | 1.668 | 0.321 |
| affective valence | cho      | high    | tp2 | 27 | 7.009 | 1.291 | 0.248 |
| affective valence | cho      | high    | tp3 | 27 | 6.5   | 1.803 | 0.347 |
| affective valence | cho      | low     | tp1 | 26 | 6.654 | 1.81  | 0.355 |
| affective valence | cho      | low     | tp2 | 26 | 6.615 | 1.675 | 0.329 |
| affective valence | cho      | low     | tp3 | 26 | 5.462 | 1.86  | 0.365 |
| affective valence | nns      | high    | tp1 | 27 | 6.741 | 1.403 | 0.27  |
| affective valence | nns      | high    | tp2 | 27 | 6.63  | 1.69  | 0.325 |
| affective valence | nns      | high    | tp3 | 27 | 6.379 | 1.643 | 0.316 |
| affective valence | nns      | low     | tp1 | 26 | 6.692 | 1.594 | 0.313 |
| affective valence | nns      | low     | tp2 | 26 | 6.308 | 1.644 | 0.322 |
| affective valence | nns      | low     | tp3 | 26 | 5.615 | 1.791 | 0.351 |

**Table S44.** Post Hoc Comparisons—TP x UTILITY.

| <b>dv_type</b> | <b>contrast</b> | <b>estimate</b> | <b>SE</b> | <b>df</b> | <b>t.ratio</b> | <b>p.value</b> | <b>cohens_d</b> |
|----------------|-----------------|-----------------|-----------|-----------|----------------|----------------|-----------------|
| affective      | low_tp1-        |                 |           |           |                |                |                 |
| valence        | low_tp2         | 0.2115          | 0.174     | 51        | 1.217          | 1.0000         | 0.12726         |
| affective      | low_tp1-        |                 |           |           |                |                |                 |
| valence        | low_tp3         | 1.1346          | 0.230     | 51        | 4.923          | 0.0001         | 0.68258         |
| affective      | low_tp2-        |                 |           |           |                |                |                 |
| valence        | low_tp3         | 0.9231          | 0.241     | 51        | 3.837          | 0.0028         | 0.55532         |
| affective      | high_tp1-       |                 |           |           |                |                |                 |
| valence        | high_tp2        | -0.1343         | 0.171     | 51        | -0.787         | 1.0000         | -0.08077        |
| affective      | high_tp1-       |                 |           |           |                |                |                 |
| valence        | high_tp3        | 0.2457          | 0.226     | 51        | 1.087          | 1.0000         | 0.14784         |
| affective      | high_tp2-       |                 |           |           |                |                |                 |
| valence        | high_tp3        | 0.3800          | 0.236     | 51        | 1.610          | 0.6818         | 0.22861         |
| affective      | low_tp1-        |                 |           |           |                |                |                 |
| valence        | high_tp1        | -0.0121         | 0.367     | 51        | -0.033         | 1.0000         | -0.00728        |
| affective      | low_tp2-        |                 |           |           |                |                |                 |
| valence        | high_tp2        | -0.3579         | 0.367     | 51        | -0.974         | 1.0000         | -0.21531        |
| affective      | low_tp3-        |                 |           |           |                |                |                 |
| valence        | high_tp3        | -0.9010         | 0.440     | 51        | -2.046         | 0.3212         | -0.54203        |

**Table S45.** Post Hoc Comparisons—TP.

| <b>dv_type</b> | <b>contrast</b> | <b>estimate</b> | <b>SE</b> | <b>df</b> | <b>t.ratio</b> | <b>p.value</b> | <b>cohens_d</b> |
|----------------|-----------------|-----------------|-----------|-----------|----------------|----------------|-----------------|
| affective      |                 |                 |           |           |                |                |                 |
| valence        | tp1-tp2         | 0.0386          | 0.122     | 51        | 0.317          | 0.7523         | 0.0232          |
| affective      |                 |                 |           |           |                |                |                 |
| valence        | tp1-tp3         | 0.6902          | 0.161     | 51        | 4.275          | 0.0003         | 0.4152          |
| affective      |                 |                 |           |           |                |                |                 |
| valence        | tp2-tp3         | 0.6515          | 0.169     | 51        | 3.866          | 0.0006         | 0.3920          |



# Sweetness

**Table S46.** ANOVA Table for sweetness ratings.

| dv_type   | Cases               | Sphericity_Correction | Mean_Square_d_Error | df(num) | df(den) | F     | p      | partial_eta_squared |
|-----------|---------------------|-----------------------|---------------------|---------|---------|-------|--------|---------------------|
| sweetness | solution            | None                  | 6.74                | 1       | 51      | 48.54 | 0.0000 | 0.49                |
| sweetness | tp                  | None                  | 0.98                | 1       | 51      | 1.16  | 0.286  | 0.02                |
| sweetness | utility             | None                  | 8.25                | 1       | 51      | 1.91  | 0.173  | 0.04                |
| sweetness | solution:utility    | None                  | 6.74                | 1       | 51      | 1.25  | 0.269  | 0.02                |
| sweetness | solution:tp         | None                  | 1.17                | 1       | 51      | 1.02  | 0.318  | 0.02                |
| sweetness | tp:utility          | None                  | 0.98                | 1       | 51      | 1.97  | 0.167  | 0.04                |
| sweetness | solution:tp:utility | None                  | 1.17                | 1       | 51      | 0.11  | 0.744  | 0                   |

**Table S47.** Descriptive statistics for sweetness ratings.

| dv_type   | solution | utility | tp  | N  | Mean  | SD    | SE    |
|-----------|----------|---------|-----|----|-------|-------|-------|
| sweetness | cho      | high    | tp2 | 27 | 7.767 | 1.534 | 0.295 |
| sweetness | cho      | high    | tp3 | 27 | 7.71  | 1.287 | 0.248 |
| sweetness | cho      | low     | tp2 | 26 | 8.153 | 1.275 | 0.25  |
| sweetness | cho      | low     | tp3 | 26 | 7.618 | 1.627 | 0.319 |
| sweetness | nns      | high    | tp2 | 27 | 4.781 | 2.722 | 0.524 |
| sweetness | nns      | high    | tp3 | 27 | 4.927 | 2.511 | 0.483 |
| sweetness | nns      | low     | tp2 | 26 | 5.867 | 2.407 | 0.472 |
| sweetness | nns      | low     | tp3 | 26 | 5.729 | 2.542 | 0.498 |

**Table S48.** Post Hoc Comparisons—SOLUTION.

| dv_type   | contrast | estimate | SE    | df | t.ratio | p.value | cohens_d |
|-----------|----------|----------|-------|----|---------|---------|----------|
| sweetness | cho-nns  | 2.49     | 0.357 | 51 | 6.967   | <.0001  | 1.2      |

# Viscosity

**Table S49.** ANOVA Table for affective viscosity ratings.

| <b>dv_ty</b><br><b>pe</b> | <b>Cases</b> | <b>Sphericity_Cor</b><br><b>rection</b> | <b>Mean_Square</b><br><b>d_Error</b> | <b>df(nu</b><br><b>m)</b> | <b>df(d</b><br><b>en)</b> | <b>F</b> | <b>p</b> | <b>partial_eta_s</b><br><b>quared</b> |
|---------------------------|--------------|-----------------------------------------|--------------------------------------|---------------------------|---------------------------|----------|----------|---------------------------------------|
| visco                     |              |                                         |                                      |                           |                           | 9.       | 0.0      |                                       |
| sity                      | solution     | None                                    | 2.3                                  | 1                         | 51                        | 44       | 03       | 0.16                                  |
| visco                     |              |                                         |                                      |                           |                           | 0.       | 0.4      |                                       |
| sity                      | tp           | None                                    | 0.72                                 | 1                         | 51                        | 49       | 86       | 0.01                                  |
| visco                     |              |                                         |                                      |                           |                           | 2.       | 0.1      |                                       |
| sity                      | utility      | None                                    | 9.29                                 | 1                         | 51                        | 28       | 37       | 0.04                                  |
| visco                     | solution:uti |                                         |                                      |                           |                           | 0.       | 0.9      |                                       |
| sity                      | lity         | None                                    | 2.3                                  | 1                         | 51                        | 01       | 08       | 0                                     |
| visco                     |              |                                         |                                      |                           |                           | 1.       | 0.2      |                                       |
| sity                      | solution:tp  | None                                    | 0.64                                 | 1                         | 51                        | 24       | 71       | 0.02                                  |
| visco                     |              |                                         |                                      |                           |                           | 0.9      |          |                                       |
| sity                      | tp:utility   | None                                    | 0.72                                 | 1                         | 51                        | 0        | 83       | 0                                     |
| visco                     | solution:tp: |                                         |                                      |                           |                           | 0.       | 0.7      |                                       |
| sity                      | utility      | None                                    | 0.64                                 | 1                         | 51                        | 14       | 06       | 0                                     |

**Table S50.** Descriptive statistics for viscosity ratings.

| <b>dv_type</b> | <b>solution</b> | <b>utility</b> | <b>tp</b> | <b>N</b> | <b>Mean</b> | <b>SD</b> | <b>SE</b> |
|----------------|-----------------|----------------|-----------|----------|-------------|-----------|-----------|
| viscosity      | cho             | high           | tp2       | 27       | 8.033       | 2.423     | 0.466     |
| viscosity      | cho             | high           | tp3       | 27       | 8.034       | 1.857     | 0.357     |
| viscosity      | cho             | low            | tp2       | 26       | 7.338       | 1.91      | 0.375     |
| viscosity      | cho             | low            | tp3       | 26       | 7.417       | 1.702     | 0.334     |
| viscosity      | nns             | high           | tp2       | 27       | 8.73        | 1.44      | 0.277     |
| viscosity      | nns             | high           | tp3       | 27       | 8.57        | 1.58      | 0.304     |
| viscosity      | nns             | low            | tp2       | 26       | 8.166       | 1.555     | 0.305     |
| viscosity      | nns             | low            | tp3       | 26       | 7.918       | 1.73      | 0.339     |

**Table S51.** Post Hoc Comparisons—SOLUTION.

| <b>dv_type</b> | <b>contrast</b> | <b>estimate</b> | <b>SE</b> | <b>df</b> | <b>t.ratio</b> | <b>p.value</b> | <b>cohens_d</b> |
|----------------|-----------------|-----------------|-----------|-----------|----------------|----------------|-----------------|
| viscosity      | cho-nns         | -0.641          | 0.209     | 51        | -3.072         | 0.0034         | -0.356          |

## Liking

**Table S52.** ANOVA Table for liking ratings.

| dv_t<br>ype | Cases                   | Sphericity_Cor<br>rection | Mean_Square<br>d_Error | df(nu<br>m) | df(d<br>en) | F  | p    | partial_eta_s<br>quared |
|-------------|-------------------------|---------------------------|------------------------|-------------|-------------|----|------|-------------------------|
| likin<br>g  | solution                | None                      | 4.26                   | 1           | 51          | 31 | 0.81 | 0.01                    |
| likin<br>g  | tp                      | None                      | 1.76                   | 1           | 51          | 0  | 0.05 | 0                       |
| likin<br>g  | utility                 | None                      | 15.79                  | 1           | 51          | 5  | 0.04 | 0.01                    |
| likin<br>g  | solution:uti<br>lity    | None                      | 4.26                   | 1           | 51          | 26 | 0.12 | 0.01                    |
| likin<br>g  | solution:tp             | None                      | 1.08                   | 1           | 51          | 28 | 0.97 | 0.01                    |
| likin<br>g  | tp:utility              | None                      | 1.76                   | 1           | 51          | 34 | 0.32 | 0.04                    |
| likin<br>g  | solution:tp:<br>utility | None                      | 1.08                   | 1           | 51          | 2  | 0.34 | 0.04                    |

**Table S53.** Descriptive statistics for liking ratings.

| dv_type | solution | utility | tp  | N  | Mean  | SD    | SE    |
|---------|----------|---------|-----|----|-------|-------|-------|
| liking  | cho      | high    | tp2 | 27 | 4.267 | 2.595 | 0.499 |
| liking  | cho      | high    | tp3 | 27 | 4.828 | 2.727 | 0.525 |
| liking  | cho      | low     | tp2 | 26 | 5.005 | 2.441 | 0.479 |
| liking  | cho      | low     | tp3 | 26 | 4.573 | 2.375 | 0.466 |
| liking  | nns      | high    | tp2 | 27 | 4.258 | 1.889 | 0.364 |
| liking  | nns      | high    | tp3 | 27 | 4.232 | 2.27  | 0.437 |
| liking  | nns      | low     | tp2 | 26 | 4.851 | 1.991 | 0.39  |
| liking  | nns      | low     | tp3 | 26 | 4.701 | 2.704 | 0.53  |

# Task difficulty

**Table S54.** ANOVA Table for task difficulty ratings.

| <b>dv_type</b> | <b>Cases</b>     | <b>Sphericity_Correction</b> | <b>Mean_Square</b> | <b>df(nu<br/>m)</b> | <b>df(d<br/>en)</b> | <b>F</b> | <b>p</b> | <b>partial_eta_s<br/>quared</b> |
|----------------|------------------|------------------------------|--------------------|---------------------|---------------------|----------|----------|---------------------------------|
| difficulty     | solution         | None                         | 4.63               | 1                   | 51                  | 3.34     | 0.073    | 0.06                            |
| difficulty     | utility          | None                         | 9.24               | 1                   | 51                  | 29.02    | 0.92     | 0.01                            |
| difficulty     | solution:utility | None                         | 4.63               | 1                   | 51                  | 49.04    | 0.89     | 0.01                            |

**Table S55.** Descriptive statistics for task difficulty ratings.

| <b>dv_type</b> | <b>solution</b> | <b>utility</b> | <b>N</b> | <b>Mean</b> | <b>SD</b> | <b>SE</b> |
|----------------|-----------------|----------------|----------|-------------|-----------|-----------|
| difficulty     | cho             | high           | 27       | 4.789       | 2.606     | 0.502     |
| difficulty     | cho             | low            | 26       | 4.817       | 2.922     | 0.573     |
| difficulty     | nns             | high           | 27       | 3.733       | 2.658     | 0.511     |
| difficulty     | nns             | low            | 26       | 4.343       | 2.312     | 0.453     |

# Solution weight

**Table S56.** ANOVA Table for solution weight.

| dv_type | Cases                   | Sphericity_Correction | Mean_Square_d_Error | df(nu<br>m) | df(d<br>en) | F   | p   | partial_eta_s<br>quared |
|---------|-------------------------|-----------------------|---------------------|-------------|-------------|-----|-----|-------------------------|
| weight  |                         |                       |                     |             |             | 56. |     |                         |
| ht      | solution                | None                  | 2.97                | 1           | 51          | 83  | 0   | 0.53                    |
| weight  |                         |                       |                     |             |             | 1.2 | 0.2 |                         |
| ht      | tp                      | None                  | 1.07                | 1           | 51          | 8   | 62  | 0.02                    |
| weight  |                         |                       |                     |             |             | 1.2 | 0.2 |                         |
| ht      | utility                 | None                  | 10.17               | 1           | 51          | 6   | 66  | 0.02                    |
| weight  |                         |                       |                     |             |             | 0.1 | 0.7 |                         |
| ht      | solution:uti<br>lity    | None                  | 2.97                | 1           | 51          | 2   | 34  | 0                       |
| weight  |                         |                       |                     |             |             | 2.8 | 0.0 |                         |
| ht      | solution:tp             | None                  | 0.38                | 1           | 51          | 5   | 97  | 0.05                    |
| weight  |                         |                       |                     |             |             | 0.1 | 0.7 |                         |
| ht      | tp:utility              | None                  | 1.07                | 1           | 51          | 2   | 26  | 0                       |
| weight  |                         |                       |                     |             |             | 0.1 | 0.7 |                         |
| ht      | solution:tp:<br>utility | None                  | 0.38                | 1           | 51          | 4   | 14  | 0                       |

**Table S57.** Descriptive statistics for solution weight.

| dv_type | solution | utility | tp   | N  | Mean   | SD    | SE    |
|---------|----------|---------|------|----|--------|-------|-------|
| weight  | cho      | high    | post | 27 | 38.407 | 1.526 | 0.294 |
| weight  | cho      | high    | pre  | 27 | 38.407 | 0.844 | 0.162 |
| weight  | cho      | low     | post | 26 | 38.962 | 2.323 | 0.456 |
| weight  | cho      | low     | pre  | 26 | 39     | 2.227 | 0.437 |
| weight  | nns      | high    | post | 27 | 36.593 | 2.358 | 0.454 |
| weight  | nns      | high    | pre  | 27 | 36.815 | 1.733 | 0.333 |
| weight  | nns      | low     | post | 26 | 36.923 | 2.058 | 0.404 |
| weight  | nns      | low     | pre  | 26 | 37.308 | 1.761 | 0.345 |

**Table S58.** Post Hoc Comparisons—SOLUTION.

| dv_type | contrast | estimate | SE    | df | t.ratio | p.value | cohens_d |
|---------|----------|----------|-------|----|---------|---------|----------|
| weight  | cho-nns  | 1.78     | 0.237 | 51 | 7.539   | <.0001  | 0.934    |

## References

- Bigdely-Shamlo, N., Mullen, T., Kothe, C., Su, K.-M., & Robbins, K. A. (2015). The PREP pipeline: standardized preprocessing for large-scale EEG analysis. *Frontiers in Neuroinformatics*, 9, B153.
- Luck, S. J., & Gaspelin, N. (2017). How to get statistically significant effects in any ERP experiment (and why you shouldn't). *Psychophysiology*, 54(1), 146–157.
